# Supplementary material for: Characterization of the functions and proteomes associated with membrane rafts in chicken sperm
Source: PLOS journal article supplement (doi:10.1371/journal.pone.0186482), 2017-11-02

## Molecular function

DRM specific

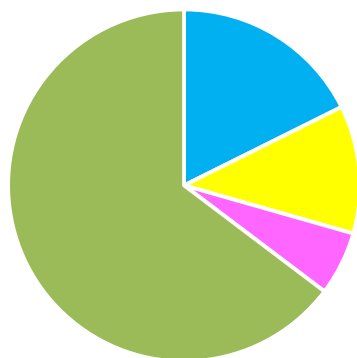

DRM enriched

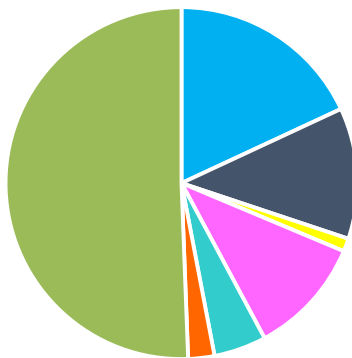

- Catalytic activity
- Binding
- Structural molecule activity
- Transporter activity
- Enzyme regulator activity
- Receptor activity
- Rotational mechanism
- Compounds
- Unclassified

Non-raft enriched

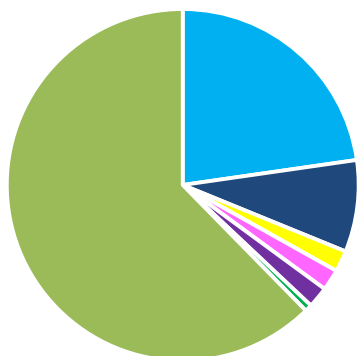

Non-raft specific

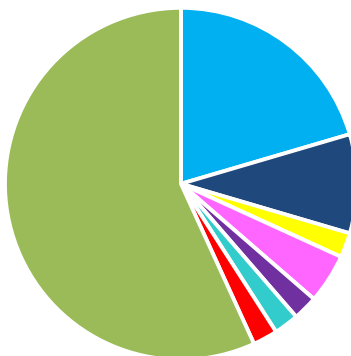

## Biological process

DRM specific

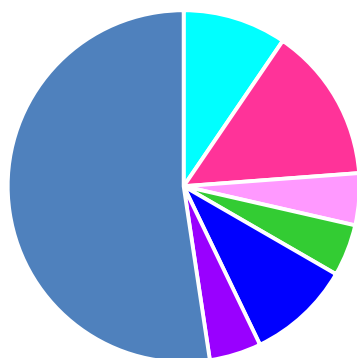

DRM enriched

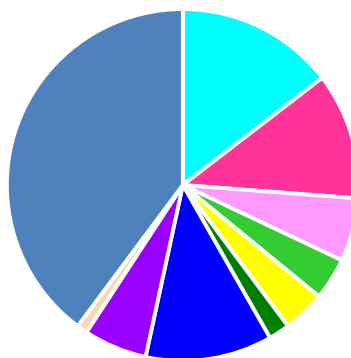

- Cellular process
- Metabolic process
- Cellular component organization or biogenesis
- Developmental process
- Multicellular organismal process
- Response to stimulus
- Localization
- Biological regulation
- Immune system process
- Compound metabolic process
- Endocytosis
- Unclassified

Non-raft enriched

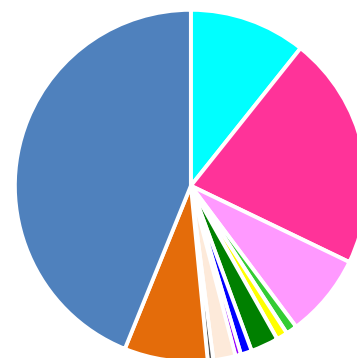

Non-raft specific

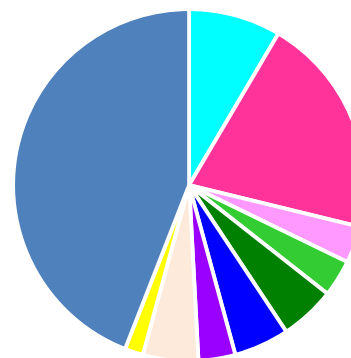

Supplement: S2 (10.1371/journal.pone.0186482.s002) [file journal.pone.0186482.s002]
